# Supplementary material for: Distinct alterations of gut microbiota between viral- and non-viral-related hepatocellular carcinoma
Source: Springer Nature journal article supplement (doi:10.1007/s00253-023-12845-1), 2024-01-06
Supplement: MOESM1 [file 253_2023_12845_MOESM1_ESM.pdf]

## **Supplemental Material**

### **Applied Microbiology and Biotechnology**

#### **Distinct alterations of gut microbiota between viral and non-viral-related hepatocellular carcinoma**

Thananya Jinato<sup>1,2</sup>, Songtham Anuntakarun<sup>1</sup>, Nantawat Sathawiwat<sup>1</sup>, Natthaya Chuaypen<sup>1\*</sup>,  
Pisit Tangkijvanich<sup>1\*</sup>

<sup>1</sup>Center of Excellence in Hepatitis and Liver Cancer, Department of Biochemistry, Faculty of Medicine, Chulalongkorn University, Bangkok, 10330, Thailand

<sup>2</sup>Doctor of Philosophy Program in Medical Sciences, Graduate Affairs, Faculty of Medicine, Chulalongkorn University, Bangkok, Thailand

\*Correspondence:

Pisit Tangkijvanich, M.D., Center of Excellence in Hepatitis and Liver Cancer, Faculty of medicine, Chulalongkorn University, Bangkok, 10330, Thailand.

pisittkvn@yahoo.com; Tel: +66 2 256 4482

\*Co-correspondence:

Natthaya Chuaypen, PhD. Center of Excellence in Hepatitis and Liver Cancer, Faculty of medicine, Chulalongkorn University, Bangkok, 10330, Thailand.

natthaya.c@chula.ac.th; natthaya.ch56@gmail.com; Tel: + 66 2 256 4482

## Supplemental Material

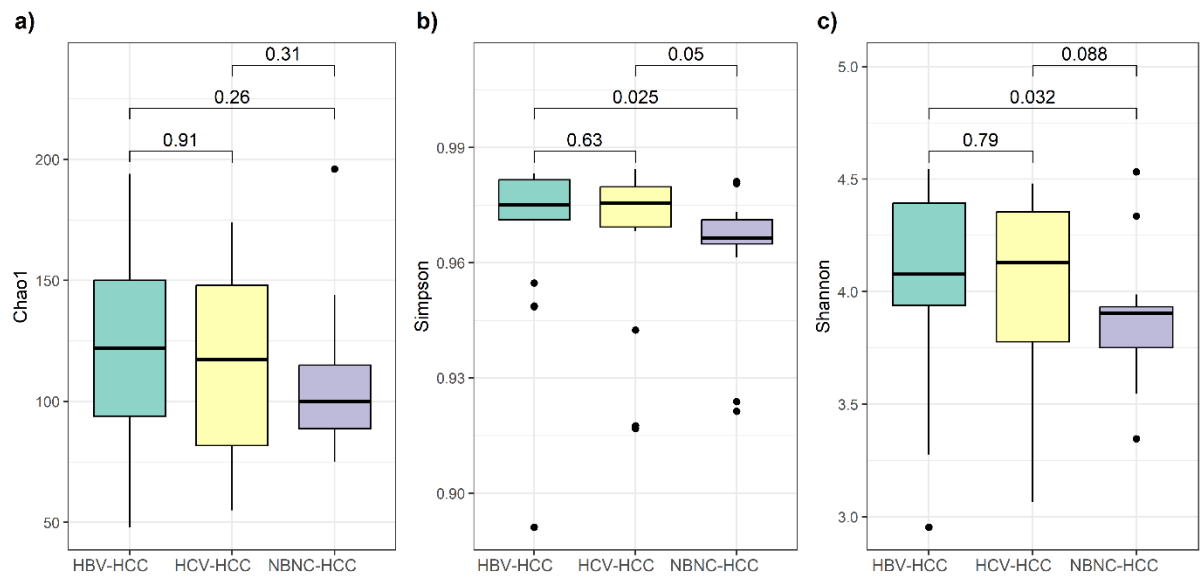

**Fig. S1** Alpha diversity indices based on (a) Chao1, (b) Simpson, and (c) Shannon compared between HBV-HCC, HCV-HCC, and NBNC-HCC

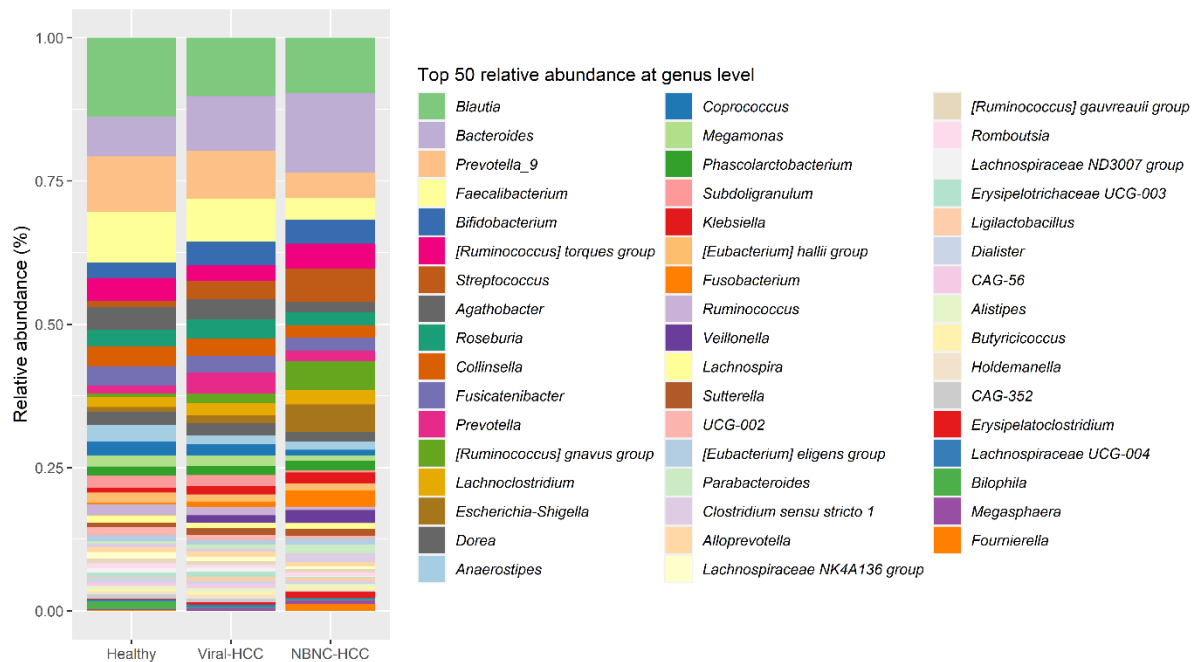

**Fig. S2** Top 50 relative abundance at the genus level in healthy, Viral-HCC and NBNC-HCC
